# Supplementary material
Source: PubMed Central journal article supplement (PMC2740426)
Supplement: supp_M109.014035_lahrsupp.pdf [file supp_M109.014035_lahrsupp.pdf]

# DRIVING FORCES OF GYRASE RECOGNITION BY THE ADDICTION TOXIN CcdB

Mario Simic, Natalie De Jonge, Remy Loris, Gorazd Vesnaver and Jurij Lah

## SUPPLEMENTAL MATERIALS

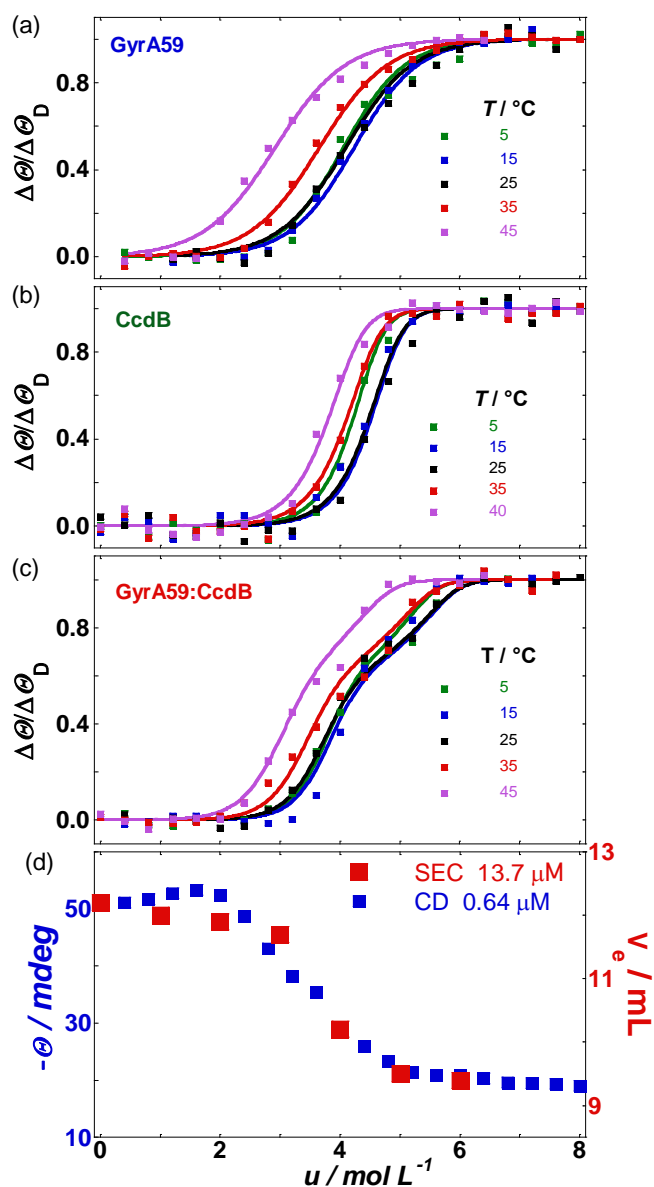

**Figure 1-SM. Modeling urea induced denaturation profiles (second dataset).** Ellipticity measured as a function of urea concentration expressed as normalized ellipticity (eq. 3 - main text) for GyrA59 (a) and CcdB (b) and GyrA59: CcdB complex (c). The presented set of experimental data was obtained at the same protein concentrations as the dataset presented in Fig. 3 – main text. Lines represent the best global fits of the denaturation models (eq. 3 - main text) to the experimental data. Comparison of GyrA59 denaturation curves measured by CD - spectroscopy and size exclusion chromatography (SEC) at 25 °C at significantly different protein concentrations is presented in panel (d). The observed concentration independence of denaturation curves indicates that GyrA59 denaturation can be considered as a monomolecular process.
